# Supplementary material for: Non-Homologous End-Joining Pathway Genotypes Significantly Associated with Nasopharyngeal Carcinoma Susceptibility
Source: MDPI journal article supplement (doi:10.3390/biomedicines11061648), 2023-06-06
Supplement: s1 [file s1]

**Supplementary Table S1.** Associations between *XRCC4* rs3734091 genotypes and NPC risk in stratified analyses

| Genotype                   | Controls | Cases | aOR (95% CI) <sup>a</sup> | p-Value <sup>b</sup> |
|----------------------------|----------|-------|---------------------------|----------------------|
| Age                        |          |       |                           |                      |
| ≤44 years old              |          |       |                           |                      |
| GG                         | 196      | 87    | 1.00 (ref)                |                      |
| GT                         | 11       | 12    | 2.18 (0.98-4.86)          | 0.0600               |
| TT                         | 1        | 2     | 3.87 (0.53-41.75)         | 0.2294               |
| >44 years old              |          |       |                           |                      |
| GG                         | 193      | 95    | 1.00 (ref)                |                      |
| GT                         | 15       | 12    | 1.49 (0.74-2.83)          | 0.3224               |
| Gender                     |          |       |                           |                      |
| Males                      |          |       |                           |                      |
| GG                         | 288      | 135   | 1.00 (ref)                |                      |
| GT                         | 17       | 16    | 1.84 (0.83-3.72)          | 0.0791               |
| TT                         | 1        | 2     | 3.63 (0.37-42.68)         | 0.2432               |
| Females                    |          |       |                           |                      |
| GG                         | 101      | 47    | 1.00 (ref)                |                      |
| GT                         | 9        | 8     | 1.78 (0.71-4.43)          | 0.3193               |
| Smoking behaviors          |          |       |                           |                      |
| Smokers                    |          |       |                           |                      |
| GG                         | 147      | 75    | 1.00 (ref)                |                      |
| GT                         | 10       | 9     | 1.63 (0.64-3.95)          | 0.3463               |
| TT                         | 1        | 1     | 1.82 (0.31-27.36)         | 1.0000               |
| Non-smokers                |          |       |                           |                      |
| GG                         | 242      | 107   | 1.00 (ref)                |                      |
| GT                         | 16       | 15    | 1.94 (0.89-3.84)          | 0.0679               |
| TT                         | 0        | 1     | ---                       | 0.3086               |
| Alcohol drinking behaviors |          |       |                           |                      |
| Drinkers                   |          |       |                           |                      |
| GG                         | 155      | 82    | 1.00 (ref)                |                      |
| GT                         | 12       | 12    | 1.77 (0.84-3.56)          | 0.2025               |
| TT                         | 1        | 1     | 1.72 (0.78-40.21)         | 1.0000               |
| Non-drinkers               |          |       |                           |                      |
| GG                         | 234      | 100   | 1.00 (ref)                |                      |
| GT                         | 14       | 12    | 1.79 (0.78-3.84)          | 0.1336               |
| TT                         | 0        | 1     | ---                       | 0.3015               |
| Betel quid chewing         |          |       |                           |                      |
| Chewers                    |          |       |                           |                      |
| GG                         | 147      | 71    | 1.00 (ref)                |                      |
| GT                         | 8        | 8     | 2.11 (0.71-4.83)          | 0.2504               |
| TT                         | 1        | 1     | 1.88 (0.14-28.98)         | 0.5484               |
| Non-chewers                |          |       |                           |                      |
| GG                         | 240      | 111   | 1.00 (ref)                |                      |
| GT                         | 18       | 16    | 1.88 (0.90-3.39)          | 0.1017               |
| TT                         | 0        | 1     | ---                       | 0.3182               |

<sup>a</sup>, by multivariate logistic regression analysis after the adjustments of confounding factors;

<sup>b</sup>, by chi-square with Yates' correction (n>5) or Fisher's exact test (n≤5); CI, confidence interval; aOR, adjusted odds ratio.

**Supplementary Table S2.** Associations between *XRCC4* rs28360071 genotypes and NPC

risk in stratified analyses

| Genotype                   | Controls | Cases | aOR (95% CI) <sup>a</sup> | p-Value <sup>b</sup> |
|----------------------------|----------|-------|---------------------------|----------------------|
| Age                        |          |       |                           |                      |
| ≤44 years old              |          |       |                           |                      |
| II                         | 125      | 60    | 1.00 (ref)                |                      |
| ID                         | 69       | 32    | 0.90 (0.65-1.44)          | 0.8968               |
| DD                         | 14       | 9     | 1.27 (0.73-2.95)          | 0.6828               |
| >44 years old              |          |       |                           |                      |
| II                         | 123      | 60    | 1.00 (ref)                |                      |
| ID                         | 71       | 38    | 1.05 (0.77-1.54)          | 0.8141               |
| DD                         | 14       | 9     | 1.40 (0.68-3.04)          | 0.7090               |
| Gender                     |          |       |                           |                      |
| Males                      |          |       |                           |                      |
| II                         | 185      | 90    | 1.00 (ref)                |                      |
| ID                         | 100      | 49    | 1.04 (0.78-1.69)          | 0.9735               |
| DD                         | 21       | 14    | 1.35 (0.74-2.21)          | 0.5040               |
| Females                    |          |       |                           |                      |
| II                         | 63       | 30    | 1.00 (ref)                |                      |
| ID                         | 40       | 21    | 1.11 (0.70-1.95)          | 0.9167               |
| DD                         | 7        | 4     | 1.09 (0.42-3.87)          | 0.7837               |
| Smoking behaviors          |          |       |                           |                      |
| Smokers                    |          |       |                           |                      |
| II                         | 95       | 48    | 1.00 (ref)                |                      |
| ID                         | 52       | 30    | 1.12 (0.64-1.91)          | 0.7547               |
| DD                         | 11       | 7     | 1.33 (0.55-3.77)          | 0.8532               |
| Non-smokers                |          |       |                           |                      |
| II                         | 153      | 72    | 1.00 (ref)                |                      |
| ID                         | 88       | 40    | 1.00 (0.58-1.82)          | 0.9788               |
| DD                         | 17       | 11    | 1.41 (0.67-2.96)          | 0.5748               |
| Alcohol drinking behaviors |          |       |                           |                      |
| Drinkers                   |          |       |                           |                      |
| II                         | 103      | 56    | 1.00 (ref)                |                      |
| ID                         | 53       | 31    | 1.12 (0.73-2.01)          | 0.9046               |
| DD                         | 12       | 8     | 1.21 (0.58-2.87)          | 0.8628               |
| Non-drinkers               |          |       |                           |                      |
| II                         | 145      | 64    | 1.00 (ref)                |                      |
| ID                         | 87       | 39    | 1.09 (0.57-1.68)          | 0.9494               |
| DD                         | 16       | 10    | 1.24 (0.70-2.95)          | 0.5567               |
| Betel quid chewing         |          |       |                           |                      |
| Chewers                    |          |       |                           |                      |
| II                         | 96       | 45    | 1.00 (ref)                |                      |
| ID                         | 50       | 28    | 1.08 (0.72-1.99)          | 0.6534               |
| DD                         | 10       | 7     | 1.33 (0.44-4.57)          | 0.6209               |
| Non-chewers                |          |       |                           |                      |
| II                         | 152      | 75    | 1.00 (ref)                |                      |
| ID                         | 90       | 42    | 1.02 (0.71-1.79)          | 0.9034               |
| DD                         | 18       | 11    | 1.14 (0.49-2.86)          | 0.7517               |

<sup>a</sup>, by multivariate logistic regression analysis after the adjustments of confounding factors;<sup>b</sup>, by chi-square with Yates' correction (n>5) or Fisher's exact test (n≤5); CI, confidence interval; aOR, adjusted odds ratio.

**Supplementary Table S3.** Associations between *XRCC6* rs5751129 genotypes and NPC risk in stratified analyses

| Genotype                   | Controls | Cases | aOR (95% CI) <sup>a</sup> | <i>p</i> -Value <sup>b</sup> |
|----------------------------|----------|-------|---------------------------|------------------------------|
| Age                        |          |       |                           |                              |
| ≤44 years old              |          |       |                           |                              |
| TT                         | 168      | 69    | 1.00 (ref)                |                              |
| CT                         | 36       | 26    | 1.55 (0.86-2.77)          | 0.0755                       |
| CC                         | 4        | 6     | 3.37 (0.93-11.84)         | 0.0712                       |
| >44 years old              |          |       |                           |                              |
| TT                         | 167      | 71    | 1.00 (ref)                |                              |
| CT                         | 37       | 29    | 1.79 (0.99-3.14)          | 0.0444*                      |
| CC                         | 4        | 6     | 3.36 (0.93-10.78)         | 0.0741                       |
| Gender                     |          |       |                           |                              |
| Males                      |          |       |                           |                              |
| TT                         | 243      | 107   | 1.00 (ref)                |                              |
| CT                         | 57       | 38    | 1.44 (0.81-2.53)          | 0.1062                       |
| CC                         | 6        | 8     | 2.91 (0.98-7.06)          | 0.0712                       |
| Females                    |          |       |                           |                              |
| TT                         | 92       | 34    | 1.00 (ref)                |                              |
| CT                         | 16       | 17    | 1.61 (0.87-3.95)          | 0.0132*                      |
| CC                         | 2        | 4     | 3.30 (0.67-19.48)         | 0.0569                       |
| Smoking behaviors          |          |       |                           |                              |
| Smokers                    |          |       |                           |                              |
| TT                         | 133      | 58    | 1.00 (ref)                |                              |
| CT                         | 23       | 22    | 1.79 (0.99-3.78)          | 0.0288*                      |
| CC                         | 2        | 5     | 3.51 (0.97-19.64)         | 0.0345*                      |
| Non-smokers                |          |       |                           |                              |
| TT                         | 202      | 83    | 1.00 (ref)                |                              |
| CT                         | 50       | 33    | 1.53 (0.89-2.54)          | 0.0889                       |
| CC                         | 6        | 7     | 2.73 (0.87-7.46)          | 0.1119                       |
| Alcohol drinking behaviors |          |       |                           |                              |
| Drinkers                   |          |       |                           |                              |
| TT                         | 133      | 65    | 1.00 (ref)                |                              |
| CT                         | 32       | 24    | 1.52 (0.82-2.98)          | 0.2186                       |
| CC                         | 3        | 6     | 3.34 (0.68-12.88)         | 0.0657                       |
| Non-drinkers               |          |       |                           |                              |
| TT                         | 202      | 76    | 1.00 (ref)                |                              |
| CT                         | 41       | 31    | 1.79 (0.98-3.32)          | 0.0148*                      |
| CC                         | 5        | 6     | 3.04 (0.96-8.38)          | 0.1048                       |
| Betel quid chewing         |          |       |                           |                              |
| Chewers                    |          |       |                           |                              |
| TT                         | 129      | 55    | 1.00 (ref)                |                              |
| CT                         | 24       | 20    | 1.82 (0.91-3.14)          | 0.0726                       |
| CC                         | 3        | 5     | 3.68 (0.92-13.69)         | 0.1107                       |
| Non-chewers                |          |       |                           |                              |
| TT                         | 206      | 86    | 1.00 (ref)                |                              |
| CT                         | 49       | 35    | 1.68 (0.90-2.31)          | 0.0478*                      |
| CC                         | 5        | 7     | 3.11 (0.94-8.57)          | 0.0706                       |

<sup>a</sup>, by multivariate logistic regression analysis after the adjustments of confounding factors;

<sup>b</sup>, by chi-square with Yates' correction ( $n > 5$ ) or Fisher's exact test ( $n \leq 5$ ); \*, statistically significant; CI, confidence interval; aOR, adjusted odds ratio.
